# Supplementary material for: The clinical association of programmed death-1/PD-L1 axis, myeloid derived suppressor cells subsets and regulatory T cells in peripheral blood of stable COPD patients
Source: PeerJ. 2024 Mar 27;12:e16988. doi: 10.7717/peerj.16988 (PMC10981408; doi:10.7717/peerj.16988)
Supplement: Supplemental Information 1 [file peerj-12-16988-s001.xlsx]

## Sheet: COPD group
No.	M-MDSC	Treg	G-MDSC	PD-1/CD4	CTLA4/CD4	PD-1/CD8	CTLA4/CD8	PD-1/Tregs	CTLA4/Tregs	CD273/G-MDSC	CD273/M-MDSC	CD274/M-MDSC	CD274/G-MDSC	pack-years of smoking	FEV1%	GOLD level
1	9.11	8.26	2.56	15.76	11.49	20.74	13.07	14.58	7.41	87.3	64.74	99.18	59.79	40	89	GOLD I-II
2	24.52	12.73	3.17	26.78	20.45	25.05	15.98	28.93	17.45	37.85	28.39	95.05	46.22	3	66.6	GOLD I-II
3	23.04	12.99	1.12	28.16	20.2	40.61	28.82	27.27	15.95	38.1	26.27	72.5	40.48	90	78.9	GOLD I-II
4	14.12	7.91	1.06	17.77	19.65	23.28	24.25	24.56	18.23	86.46	16.69	97.65	55.21	100	52	GOLD I-II
5	6.25	8.48	2.91	12.5	12.27	17.62	15.04	15.7	11.22	31.02	0.37	64.05	21.66	40	67	GOLD I-II
6	10.11	9.11	1.97	6.62	7.2	6.63	9.36	5.93	5.38	34.39	6.39	88.1	35.03	50	65.7	GOLD I-II
7	20.55	10.08	2.21	27.85	22.53	30.8	22.52	27.16	16.3	30.21	97.2	100	84.38	20	57	GOLD I-II
8	28.69	15.61	2.89	28.68	23.52	23.84	21.26	31.7	21.09	39.2	88.8	99.36	46.4	15	78	GOLD I-II
9	35.39	8.89	5.89	29.94	25.6	31.58	27	34.49	20.35	16.73	19.31	87.91	14.59	27	56	GOLD I-II
10	6.89	9.9	3.04	26.85	20.26	33.97	25.55	21.29	12.82	46.47	11.29	84.09	67.4	15	68	GOLD I-II
11	8.67	9.03	1.55	35.07	23.88	27.82	22.03	20	12.7	58.74	98.13	98.25	69.58	10	65	GOLD I-II
12	19.24	13.91	2.16	30.89	25.67	27.7	26.3	24.51	18.51	35.65	35.95	72.83	56.78	0	61	GOLD I-II
13	6.9	8.33	2.12	19.64	17.08	13.27	13.35	22.01	14.94	77.8	13.08	98.7	52.64	25	70	GOLD I-II
14	3.57	8.89	0.86	30.01	24.43	39.2	27.63	30.6	18.9	29.41	73.27	77.66	74.21	0	77.8	GOLD I-II
15	8.8	8.38	4.14	27.85	23.81	27.2	20.36	17.51	13.03	50.33	18.56	94.67	62.96	20	85	GOLD I-II
16	9.01	7.69	3.28	7.52	4.22	9.78	5.27	9.1	4.81	39.24	93.48	98	61.6	50	81	GOLD I-II
17	18.4	5.67	3.67	21.4	21.95	32.12	33.08	19.05	17.28	6.9	95.83	99.22	63.22	0	69.1	GOLD I-II
18	10.15	7.9	3.56	11.44	13.52	21.97	20.34	13.29	12.41	29.64	69.91	98.4	65.15	0	71.4	GOLD I-II
19	12.05	6.09	5.46	32.23	27.31	42.03	36.33	29.4	22.53	56.02	97.34	99.24	73.39	0	70	GOLD I-II
20	18.74	11.73	2.07	22.37	23.06	25.95	31.07	22.85	20.2	70.72	95.83	99.89	91.78	50	89	GOLD I-II
21	5.1	5.73	5.49	13.9	13.89	18.36	22.44	17.13	12.92	33.95	90.7	100	76.23	0	56.7	GOLD I-II
22	27.47	8.25	0.99	20.61	18.23	17.48	21.02	22.14	14.45	53.38	62.3	98.44	72.3	10	54.4	GOLD I-II
23	22.6	8.96	3.27	30.64	26.81	44.25	40.76	33.7	25.43	10.53	16	99.24	47.37	0	76	GOLD I-II
24	5.68	6.76	1.87	19.99	16.82	22.66	21.99	12.43	9.02	41.38	92.82	99.81	93.68	45	57.8	GOLD I-II
25	2.95	7.29	0.66	12.58	10.45	9.41	11.67	13.03	9.19	28.16	85.33	99.74	64.37	0	60	GOLD I-II
26	7.11	15.02	1.35	10.89	12.5	9.25	13.76	13.76	6.88	84.55	18.76	97.07	71.82	30	22.3	GOLDIII-IV
27	17.74	6.95	1.51	17.28	13.52	22.41	17.65	17.87	10.66	64.75	25.35	94.08	29.51	40	33.3	GOLDIII-IV
28	21.38	8.13	2.32	26.66	22.44	32.67	28.41	28.24	19.83	23.23	89.75	88.58	40.07	9	29.3	GOLDIII-IV
29	9.98	6.8	1.47	19.14	18.92	36.1	34.48	29.09	18.04	61.6	86.7	99.33	54.37	40	46	GOLDIII-IV
30	27.31	9.95	4.58	38.42	29.62	24.73	19.34	25.6	12.25	31.25	63.67	95.81	36.98	40	45	GOLDIII-IV
31	15.43	9.34	1.51	27.5	23.03	21.97	18.06	26.98	18.02	42.86	51.08	78.34	32.97	2	48.1	GOLDIII-IV
32	16.1	4.48	4.6	44.02	33.55	13.83	11.7	33.43	21.55	54.62	3.8	74.59	23.41	0	45.6	GOLDIII-IV
33	17.02	7.1	1.31	28.96	27.06	30.28	31.26	21.75	18.93	67.2	26.95	99.76	50.79	0	43.2	GOLDIII-IV
34	26.48	10.66	5.49	29.34	24.16	34.61	30.77	30.44	21.77	49.35	90.23	94.48	68.53	0	43	GOLDIII-IV
35	21.82	10.39	2.92	22.04	18.16	30.5	26.31	27.72	16.07	83.85	83.29	98.94	53.95	50	25	GOLDIII-IV
36	22.86	17.97	8.02	26.89	19.66	35.63	27.67	28.18	14.03	82.38	36	98.91	41.97	12	35.9	GOLDIII-IV
37	21.81	6.13	2.73	19.89	16.59	38.27	26.05	30.14	20.87	40.97	93.65	55.6	37	28	43.3	GOLDIII-IV
38	20.6	8.17	0.58	13.54	8.49	14.71	7.98	18.67	9.64	76.67	75.82	72.82	26.67	50	39.8	GOLDIII-IV
39	16.06	10.89	1.58	14.16	9.68	32.94	21.36	16.44	7.07	18.88	22.2	55.35	20.08	20	42.6	GOLDIII-IV
40	7.22	8.41	2.62	19.79	17.18	18.64	16.95	21.98	14.65	12.62	2.46	92.96	45.15	0	39.1	GOLDIII-IV
41	10.01	10.67	1.46	40.58	28.5	23.38	15.88	27.55	15.18	17.21	2.28	74.23	45.78	60	32.7	GOLDIII-IV
42	13.82	10.39	4.5	19.67	16.28	12.88	13.35	25.83	15.02	30.3	33.66	58.98	18.73	30	15.7	GOLDIII-IV
43	11.61	9.01	1.64	25.56	19.01	50.05	34.48	30.41	15.76	20	63	42.22	50.32	15	29	GOLDIII-IV
44	22.21	6.58	4.21	42.14	37.84	26.17	21.15	25.92	17.55	29.63	1.4	84.17	32.72	20	39	GOLDIII-IV
45	21.48	7.32	5.59	27.76	22.68	22.16	17.7	33.18	21.1	50.6	36.79	73.73	39.64	3	41	GOLDIII-IV
46	23.06	14.14	5.78	40.88	32.42	45.02	38.55	49.03	27.43	37.5	85.82	98.81	47.62	6	35.9	GOLDIII-IV
47	20.48	7	3.59	26.24	14.89	24.46	16.22	17.95	8.35	48.41	50.1	99.44	74.64	62	35.1	GOLDIII-IV
48	18.65	6.15	3.22	25.73	26.19	43.88	42.01	37.34	28.33	17.33	88.78	89.15	76.53	0	39.1	GOLDIII-IV
49	15.87	10.93	3.75	18.65	20.22	25.59	28.11	14.27	14.89	22.9	59.11	99.59	66.09	60	47.7	GOLDIII-IV
50	9.69	2.67	1.72	13	11.35	7.32	12.83	15.25	8.9	41.92	83.44	90.69	57.07	0	40.4	GOLDIII-IV
51	12.41	8.85	1.7	15.12	14.76	37.13	28.27	21.18	14.99	16.24	93.68	100	91.45	60	28	GOLDIII-IV
52	9.92	8.5	0.84	34.951	28.71	29.95	28.23	37.29	27.88	48.95	91.14	99.52	71.33	0	46.9	GOLDIII-IV
53	7.84	11.65	1.19	30.64	26.89	34.14	32.65	33.56	22.23	24.17	43.88	98.23	66.67	0	45.1	GOLDIII-IV
54	7.64	7.4	1.21	12.41	13	16.52	19.03	10	9.73	8.18	6.19	93.24	33.64	50	28.2	GOLDIII-IV

## Sheet: control group
No.	M-MDSC	Treg	G-MDSC	PD-1/CD4	CTLA4/CD4	PD-1/CD8	CTLA4/CD8	PD-1/Tregs	CTLA4/Tregs	CD273/G-MDSC	CD273/M-MDSC	CD274/M-MDSC	CD274/G-MDSC
1	10.77	7.06	0.51	22.59	15.04	23.03	17.91	22.38	4.38	64.71	86.53	18.89	32.41
2	3.84	6.09	0.89	15.89	11.73	22.53	17.96	12.5	12.19	47.52	98.92	73.47	27.49
3	8.6	8.5	2.57	11	8.99	32.65	27.95	23.16	13.88	55.6	96.14	86.58	37
4	10.9	7.86	2.12	20.13	14	29.66	23.89	21.75	6.25	71.81	97.35	2.17	40.14
5	11.3	7.12	1.72	29.05	22.81	43.33	29.34	30.67	15.38	82.67	99.31	3.75	69.28
6	14	7.72	0.7	17.49	13.78	24.5	21.26	14.77	12.6	67.93	73.37	11.52	73.27
7	6.33	8.77	1.51	15.67	12.86	13.77	13.9	20.82	9.2	52.48	58.26	32.37	65.67
8	9.76	9.22	1.1	24.52	21.84	33.34	28.71	26.88	12.59	82	21.92	5.9	53.69
9	6.68	3.93	1.18	27.95	21.2	24.17	21.92	27.93	15.99	57.14	34.86	52.64	48
10	11.9	5.37	1.42	14.13	12.93	15.31	14.85	13.4	9.41	20.28	81.12	17.05	94.12
11	6.27	8.12	1.43	10.55	23.02	17.5	14.12	13.65	12.64	35.69	63.94	88.94	86.3
12	9.07	9.02	2.9	22.63	16.35	24.46	21.54	20.84	10.99	30.57	58.6	86.33	82.26
13	9.18	7.58	1.1	18.02	14.76	22.68	19.68	17.01	11.89	68.69	81.15	93.07	98.16
14	9.21	6.89	1.51	21.14	17.64	14.23	14.16	21.63	9.74	41.65	65.7	48.85	97.67
15	8.23	7.95	1.23	12.65	12.06	35.68	30.35	22.52	10.71	42.3	63.92	95.73	41.21
16	7.96	8.42	2.51	19.06	14.18	21.68	19.9	22.33	12.19	48.59	42.61	38	70.18
17	14.69	8.4	1.7	18.58	17.15	29.34	28.38	16.83	8.29	31.44	33.17	80.92	42.98
18	9.64	5.64	1.4	15.58	14.08	30.17	26.9	31.46	13.9	28.86	68.35	7.77	73.79
19	4.57	7.45	1.53	15.04	12.2	36.32	25.86	27.38	13.08	19.17	92.48	62.49	98.41
20	15.83	6.25	1.61	25.11	17.94	12.73	15.25	17.9	16.91	80.18	79.74	40.53	94.81
21	5	9.06	2.96	14.1	13.91	17.85	14.13	20.64	13.28	62.76	90.79	52	90.18
22	5.74	4.4	1.61	14.61	17.03	18.99	21.48	23	15.19	26.55	60.45	49.45	64.61
23	7.89	6.38	3.2	21.88	19.5	20.18	21.45	16.54	13.74	50.56	84.75	94.54	83.12
24	9.17	7.12	1.96	10.14	9.97	17.07	15.44	12.92	12.58	29.28	60.81	93.57	68.84
